# Supplementary material for: Whole-Exome Sequencing Reveals a Rare Variant of OTOF Gene Causing Congenital Non-syndromic Hearing Loss Among Large Muslim Families Favoring Consanguinity
Source: PubMed Central journal article supplement (PMC8185570; doi:10.3389/fgene.2021.641925), 2021-05-25
Supplement: Data_Sheet_1.pdf [file Data_Sheet_1.pdf]

## Supplementary material

### Whole-exome Sequencing Reveals a Rare Variant of *OTOF* Gene Causing Congenital Non-syndromic Hearing Loss Among Large Muslim Families Favoring Consanguinity

Mohd Fareed<sup>1,2\*</sup>, Varun Sharma<sup>3</sup>, Inderpal Singh<sup>4</sup>, Sayeed Ur Rehman<sup>5</sup>, Gurdarshan Singh<sup>1,2</sup>, Mohammad Afzal<sup>6</sup>

<sup>1</sup>PK-PD Formulation & Toxicology Division, CSIR Indian Institute of Integrative Medicine, Canal Road, Jammu, India

<sup>2</sup>Academy of Scientific & Innovative Research (AcSIR), Ghaziabad, Uttar Pradesh, India

<sup>3</sup>Ancient DNA Laboratory, Birbal Sahni Institute of Palaeosciences, Lucknow, Uttar Pradesh, India

<sup>4</sup>BioinfoRes, R. S. Pura, Jammu, India

<sup>5</sup>Department of Biochemistry, School of Chemical and Life Sciences, Jamia Hamdard, New Delhi, India

<sup>6</sup>Human Genetics & Toxicology Laboratory, Section of Genetics, Department of Zoology, Aligarh Muslim University, Aligarh, Uttar Pradesh, India

\*Corresponding author (M. Fareed) Tel.: +91-9622025886

Email address: [m.fareed@iiim.res.in](mailto:m.fareed@iiim.res.in); [mohdfareedk@gmail.com](mailto:mohdfareedk@gmail.com); [fareedgenetics2012@gmail.com](mailto:fareedgenetics2012@gmail.com)

## Supplemental Appendix 1

Whole exome sequencing analysis report : raw data, bioinformatics and interpretation.

**Table S1.** DNA quantification using QIAXPERT and Qubit and purity check using 260/280nm ratio.

| SAMPLE ID | Sample name | QIAXPERT (ng/ $\mu$ L) | A260/280 RATIO | QUBIT (ng/ $\mu$ L) HS | COMMENTS (QC PASS/FAIL) |
|-----------|-------------|------------------------|----------------|------------------------|-------------------------|
| 229830    | K11         | 77.8                   | 1.13           | 19.1                   | PASS                    |
| 229824    | C4          | 1088.4                 | 1.79           | 676                    | PASS                    |
| 229831    | M12         | 215.8                  | 1.76           | 158                    | PASS                    |
| 229829    | H9          | 1701.8                 | 1.83           | 494                    | PASS                    |
| 229825    | D5          | 30.7                   | 1.44           | 11.2                   | PASS                    |
| 229827    | F7          | 97.5                   | 1.82           | 90.6                   | PASS                    |
| 229828    | G8          | 122                    | 1.89           | 51                     | PASS                    |

**C4**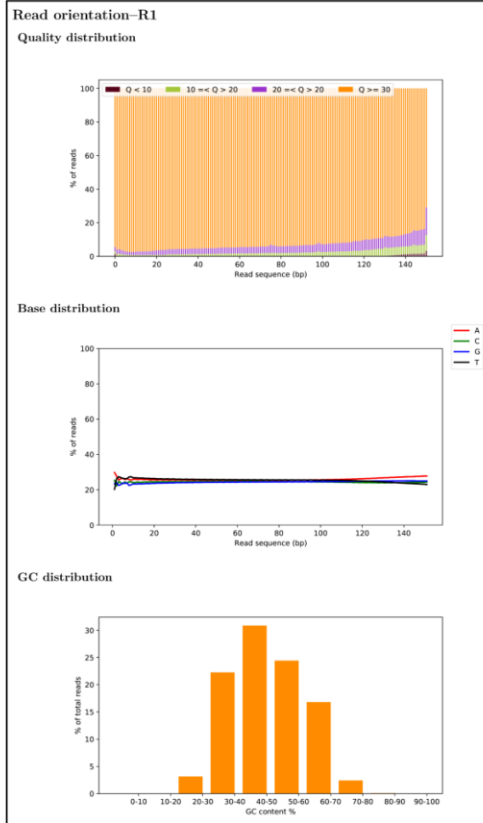**C4**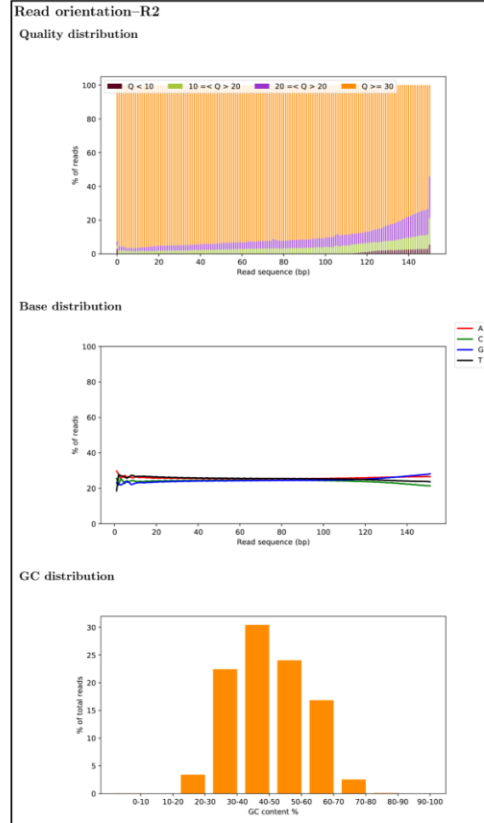**D5**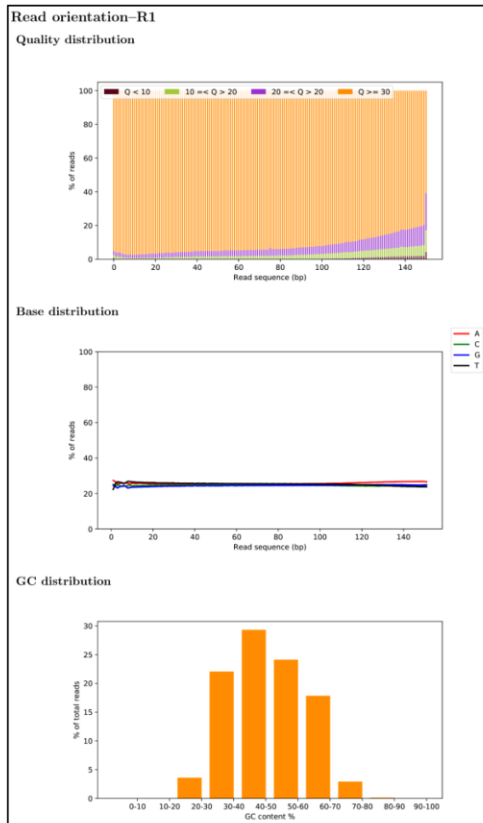**D5**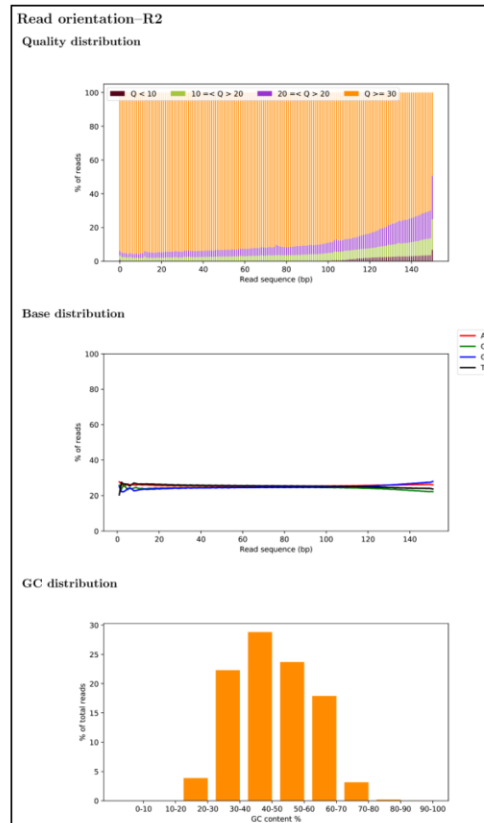

**Figure S1.** Quality check of reads for whole-exome sequencing (WES) strategy.

**F7**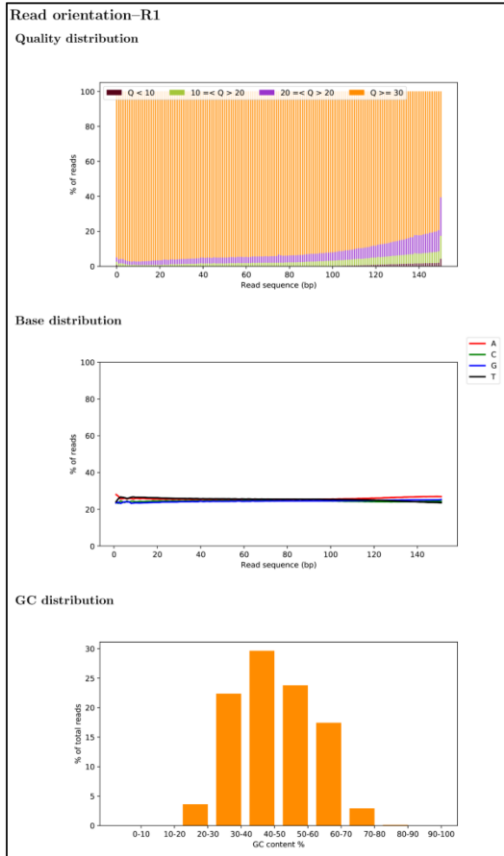**F7**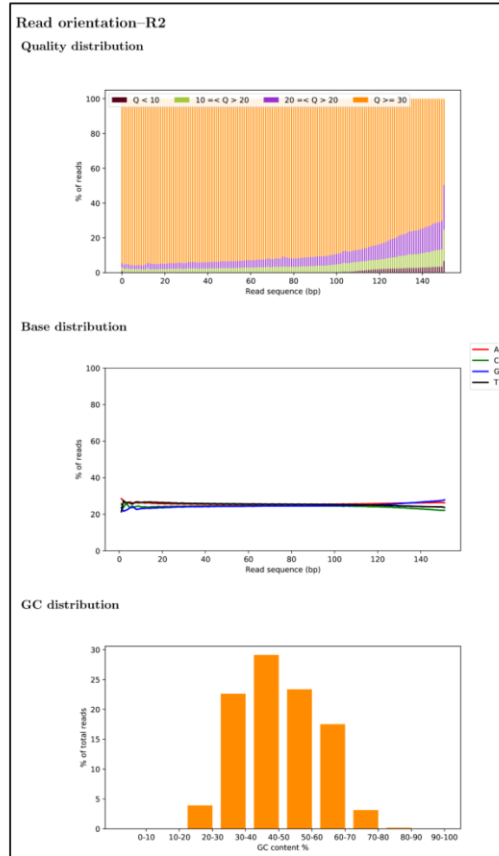**G8**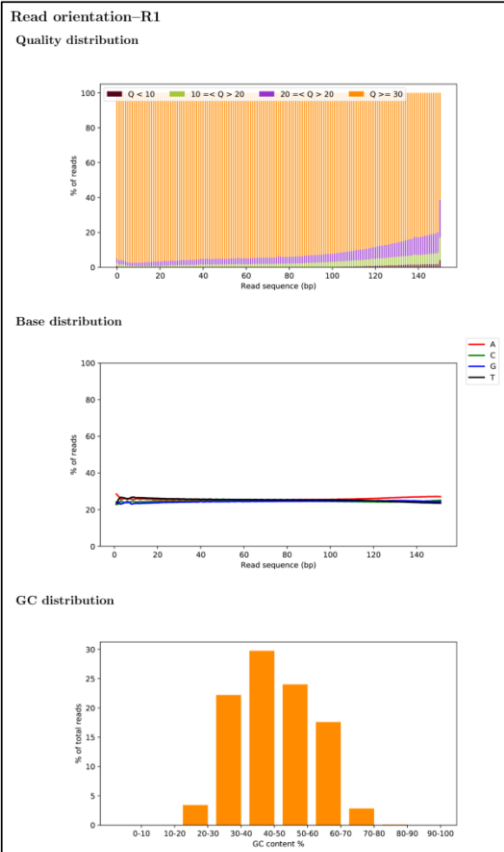**G8**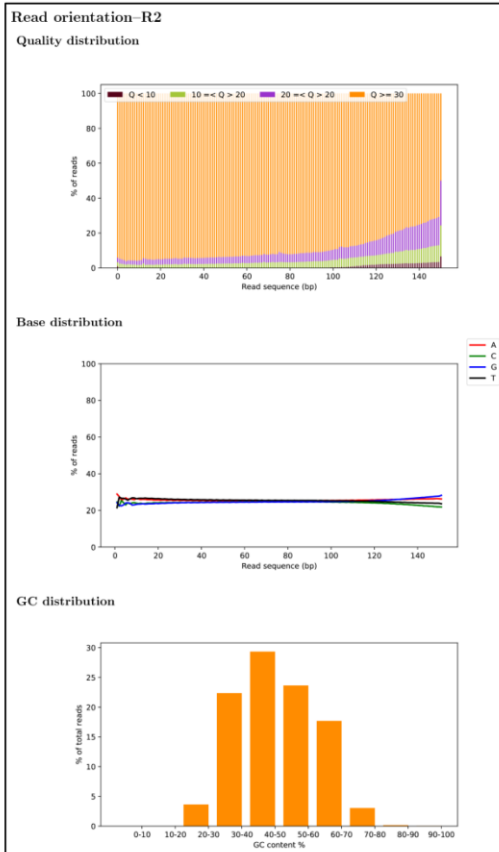

**Figure S1. Continued.**

**H9**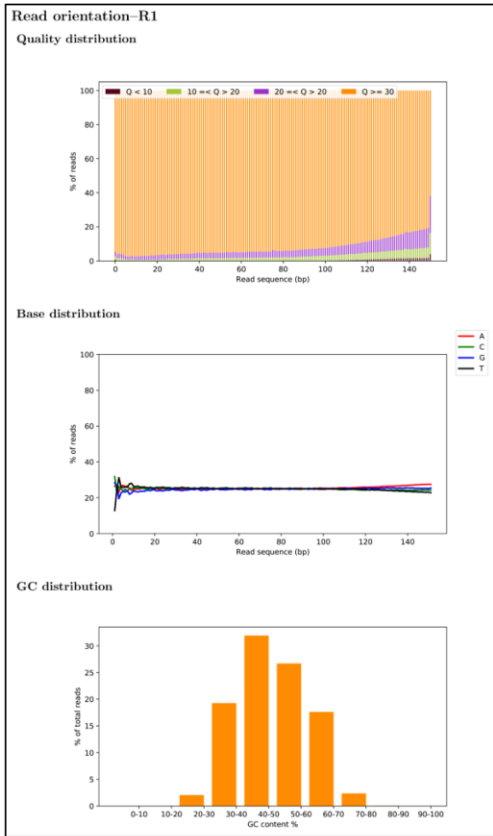**H9**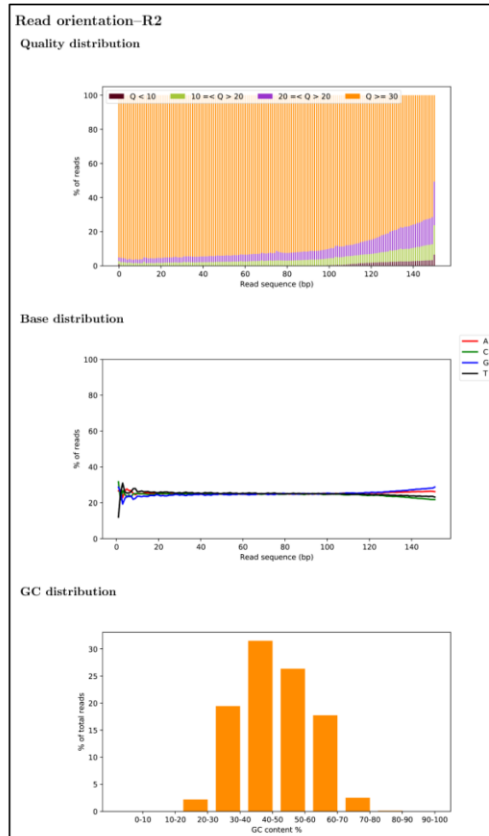**K11**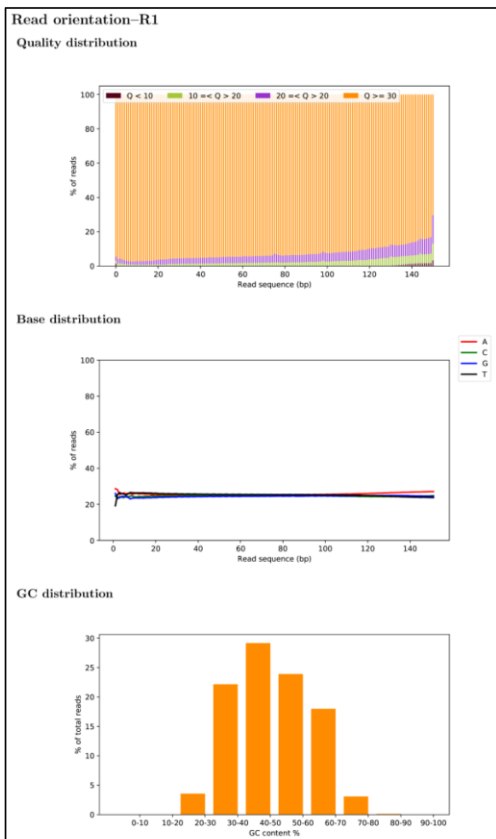**K11**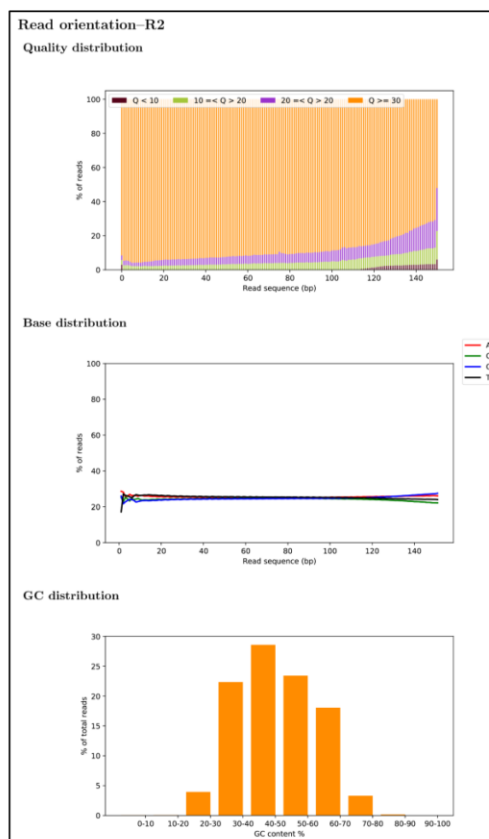**Figure S1. Continued.**

**M12**

Read orientation-R1  
Quality distribution

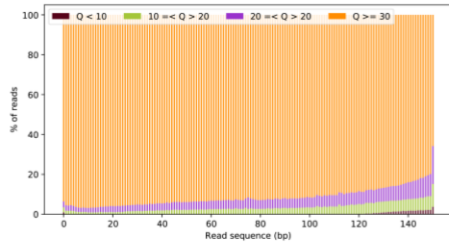

Base distribution

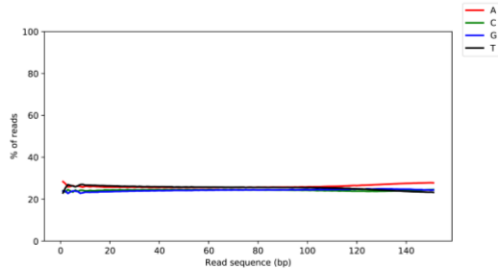

GC distribution

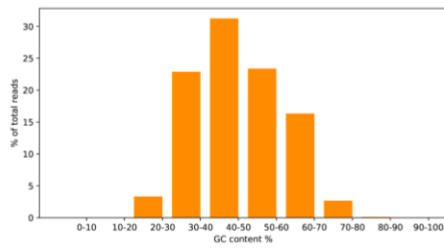**M12**

Read orientation-R2  
Quality distribution

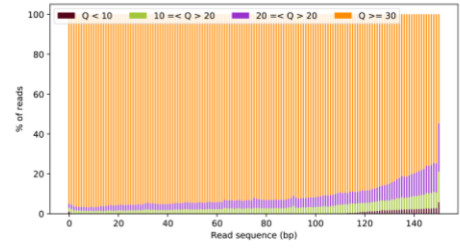

Base distribution

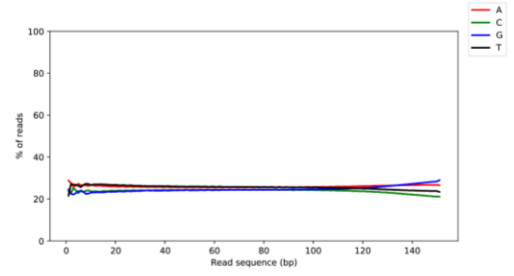

GC distribution

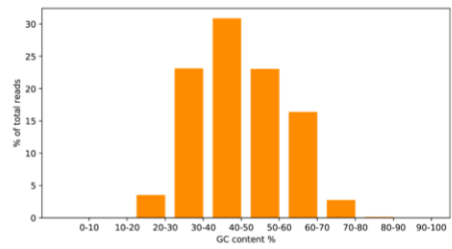

Figure S1. Continued.

**Table S2.** Alignment Summary

| Sample Names | TOTAL READS | TOTAL ALIGNED | TOTAL PASSED ALIGNMENT | TOTAL CROSSMAPPED | TOTAL UNALIGNED |
|--------------|-------------|---------------|------------------------|-------------------|-----------------|
| F7           | 72150712    | 72149198      | 70728453 (98.03%)      | 87911 (0.12%)     | 2740            |
| H9           | 80766664    | 80593492      | 78555988(97.26%)       | 155550(0.19%)     | 194468          |
| D5           | 70965600    | 70962916      | 69452491 (97.87%)      | 86232 (0.12%)     | 3962            |
| C4           | 65293460    | 65290814      | 63973588(97.98%)       | 113019(0.17%)     | 3513            |
| K11          | 70804492    | 70800392      | 69253277(97.81%)       | 168623(0.24%)     | 5442            |
| M12          | 72730512    | 72729088      | 71311719(98.05%)       | 96650(0.13%)      | 2884            |
| G8           | 71739982    | 71738344      | 70262393 (97.94%)      | 95059 (0.13%)     | 2881            |

**Table S3:** Coverage Statistics

| STATISTICS                | C4       | D5       | G8       | K11      | M12      | H9       | F7       |
|---------------------------|----------|----------|----------|----------|----------|----------|----------|
| PANEL COVERAGE PERCENTAGE | 99.2699  | 99.32332 | 99.32033 | 99.33097 | 99.28246 | 99.17543 | 99.23325 |
| PANEL AVG DEPTH           | 92.71648 | 93.76819 | 97.88315 | 93.54067 | 99.79161 | 111.0506 | 98.19158 |
| READ ONTARGET PERCENTAGE  | 91.58323 | 89.68186 | 90.39168 | 89.90594 | 91.3209  | 91.00202 | 90.65963 |

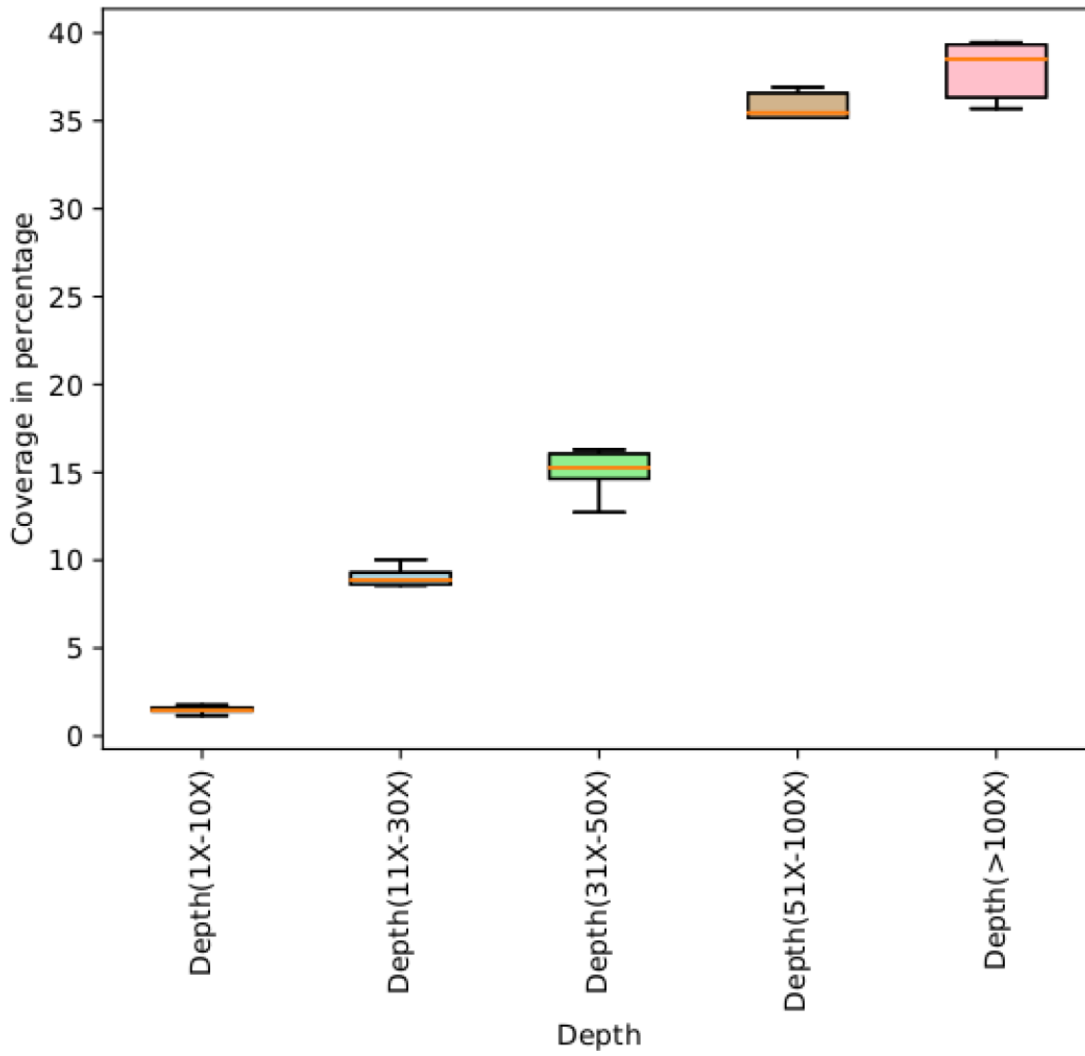

**Figure S2.** Distribution of Depth. The X-axis represents the Depth in a series of intervals and the Y-axis represents coverage in percentage.



### (A) Variant Filtering Pipeline

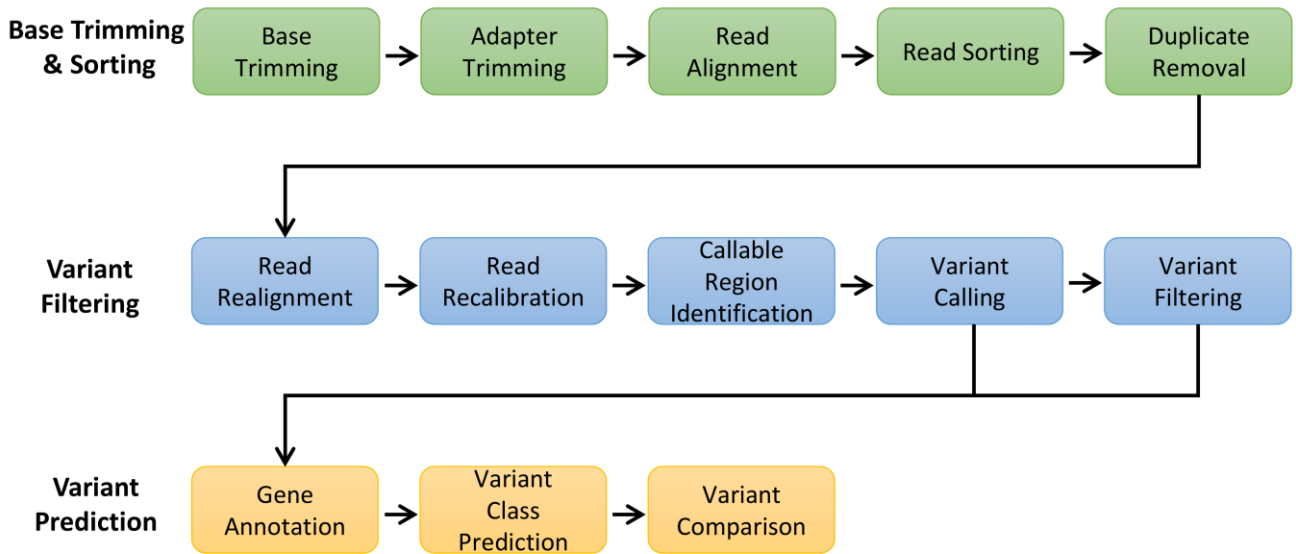

### (B) Variant Annotation Pipeline

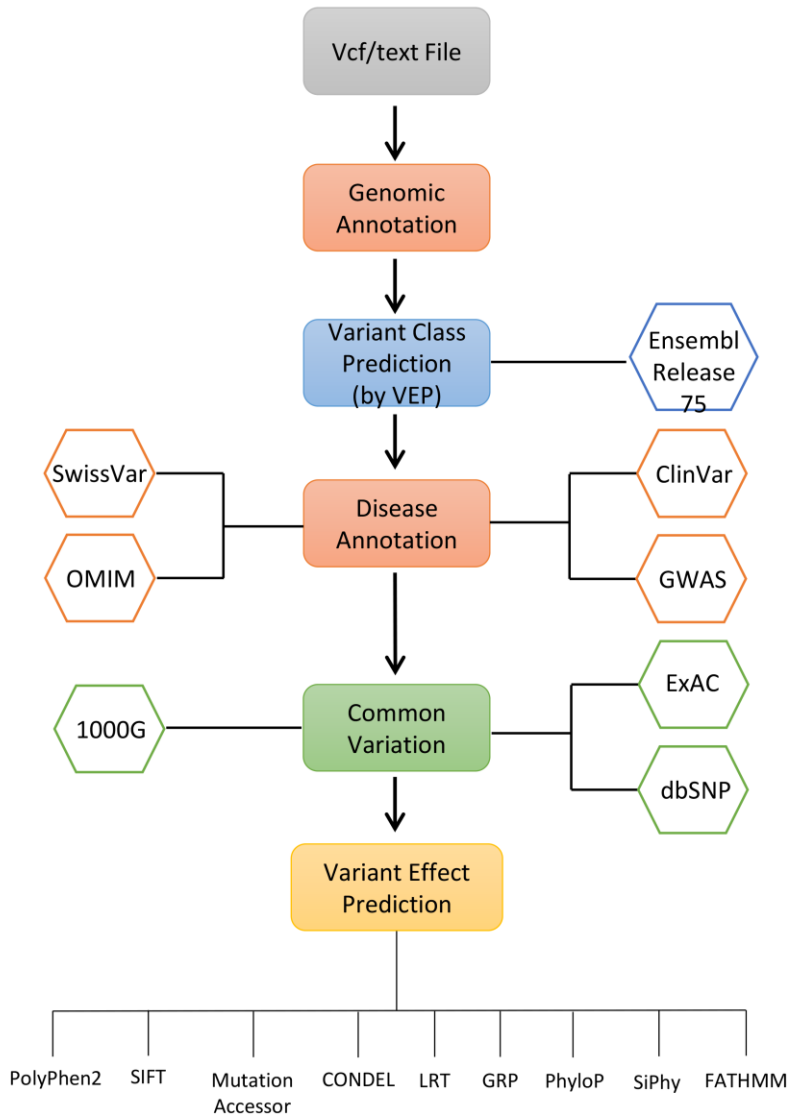

**Figure S3.** Flowchart depicting the variant filtering and variant annotation pipelines used in the study.

**Table S4. Variant Statistics**

| STATISTICS           | K11       | F7       | M12      | G8       | D5       | H9       | C4       |
|----------------------|-----------|----------|----------|----------|----------|----------|----------|
| TOTAL VARIANTS       | 72631     | 72578    | 71859    | 72756    | 72131    | 71582    | 70243    |
| TOTAL SNPs           | 64552     | 64317    | 63833    | 64618    | 64001    | 63669    | 62533    |
| TOTAL INDELS         | 8079      | 8261     | 8026     | 8138     | 8130     | 7913     | 7710     |
| TOTAL HET            | 44812     | 43198    | 43408    | 44243    | 44286    | 43083    | 40057    |
| TOTAL HOM            | 27819     | 29380    | 28451    | 28513    | 27845    | 28499    | 30186    |
| AVERAGE DEPTH        | 89.3948   | 91.75552 | 93.26466 | 92.67544 | 88.67584 | 104.4907 | 87.85621 |
| MIN READ DEPTH       | 10        | 10       | 10       | 10       | 10       | 10       | 10       |
| MAX READ DEPTH       | 4196      | 4960     | 3822     | 4379     | 4876     | 4276     | 3119     |
| AVERAGE VARIANT QUAL | 1601.9172 | 1679.093 | 1602.515 | 1644.353 | 1582.107 | 1828.829 | 1585.79  |
| MIN VARIANT QUAL     | 50.73     | 50.73    | 50.73    | 50.37    | 50.73    | 50.73    | 50.73    |
| MAX VARIANT QUAL     | 119762    | 144553   | 117735   | 125719   | 140937   | 124170   | 86802.8  |

**Table S5. Variant Class Summary**

| STATISTICS        | H9    | K11   | C4    | M12   | D5    | G8    | F7    |
|-------------------|-------|-------|-------|-------|-------|-------|-------|
| Silent            | 10722 | 10822 | 10467 | 10668 | 10677 | 10851 | 10762 |
| Missense          | 10846 | 10906 | 10608 | 10785 | 10815 | 10850 | 10909 |
| Nonsense          | 151   | 141   | 150   | 144   | 140   | 141   | 143   |
| Startloss         | 55    | 62    | 49    | 59    | 51    | 56    | 49    |
| Stoploss          | 58    | 65    | 61    | 64    | 62    | 65    | 63    |
| Frameshift- indel | 337   | 356   | 331   | 354   | 340   | 366   | 362   |
| Inframe-indel     | 247   | 263   | 230   | 237   | 251   | 256   | 253   |

**Table S6. Variant Statistics for probable causative positions.**

| Sample Name | Total Variants | SNPs  | Insertions | Deletions | SNP Transitions/Transversions | Total Het/Hom ratio   |
|-------------|----------------|-------|------------|-----------|-------------------------------|-----------------------|
| C4          | 41576          | 36227 | 2467       | 2882      | 2.36 (36513/15477)            | 1.32<br>(23644/17932) |
| F7          | 46377          | 40316 | 2721       | 3340      | 2.34 (39397/16831)            | 1.55<br>(28189/18188) |
| H9          | 44701          | 38998 | 2603       | 3100      | 2.36 (38036/16124)            | 1.59<br>(27434/17267) |
| M12         | 43099          | 37595 | 2507       | 2997      | 2.33 (36280/15559)            | 1.65<br>(26833/16266) |
| D5          | 45472          | 39640 | 2686       | 3146      | 2.35 (38388/16355)            | 1.65<br>(28337/17135) |
| G8          | 46067          | 40111 | 2742       | 3214      | 2.36 (38360/16243)            | 1.78<br>(29500/16567) |
| K11         | 46828          | 40764 | 2732       | 3332      | 2.38 (39464/16560)            | 1.70<br>(29461/17367) |

**Table S7. Variant Class Statistics for probable causative positions.**

| STATISTICS      | M12  | C4   | D5   | K11  | F7   | G8   | H9   |
|-----------------|------|------|------|------|------|------|------|
| MISSENSE        | 2525 | 2439 | 2508 | 2613 | 2567 | 2581 | 2591 |
| SILENT          | 2661 | 2595 | 2675 | 2781 | 2728 | 2773 | 2720 |
| NONSENSE        | 22   | 27   | 20   | 26   | 22   | 23   | 24   |
| STARTLOSS       | 8    | 6    | 7    | 9    | 8    | 11   | 7    |
| STOPLOSS        | 12   | 10   | 12   | 14   | 13   | 11   | 14   |
| FRAMESHIFT- DEL | 37   | 39   | 34   | 44   | 46   | 48   | 42   |
| FRAMESHIFT- INS | 45   | 41   | 43   | 40   | 36   | 46   | 36   |
| INFRAME-INS     | 37   | 36   | 37   | 41   | 37   | 46   | 39   |
| INFRAME-DEL     | 45   | 43   | 43   | 47   | 45   | 48   | 41   |

**Table S8. Variant Statistics for probable causative Genes.**

| Sample Name | Total Variants |
|-------------|----------------|
| C4          | 1394           |
| D5          | 1709           |
| F7          | 1746           |
| G8          | 1700           |
| H9          | 1749           |
| K11         | 1887           |
| M12         | 1589           |

**Table S9. Variant class Statistics for probable causative Genes.**

| STATISTICS | D5 | H9 | K11 | G8 | M12 | F7 | C4 |
|------------|----|----|-----|----|-----|----|----|
| MISSENSE   | 67 | 63 | 74  | 79 | 62  | 68 | 62 |
| SILENT     | 74 | 71 | 79  | 73 | 73  | 69 | 67 |

**Table S10. Summary of observed probable causative variants.**

| Gene_Name | CHROM_POS       | cDNA_Change | AA_Change    | Variant_Type                             | Genotype | snpEff_Impact |
|-----------|-----------------|-------------|--------------|------------------------------------------|----------|---------------|
| ABCA13    | chr7:48411769   | c.10808T>C  | p.Met3603Thr | missense_variant                         | Het      | MODERATE      |
| ABCA2     | chr9:139915947  | c.884G>A    | p.Arg295Gln  | missense_variant                         | Het      | MODERATE      |
| ABCC6     | chr16:16308285  | c.496C>T    | p.Arg166Cys  | missense_variant                         | Het      | MODERATE      |
| ADAMTS13  | chr9:136298777  | c.1261C>T   | .            | structural_interaction_variant           | Het      | HIGH          |
| ADAMTSL3  | chr15:84553914  | c.1022A>G   | p.His341Arg  | missense_variant                         | Het      | MODERATE      |
| ANK3      | chr10:61946612  | c.1946C>T   | p.Thr649Ile  | missense_variant                         | Het      | MODERATE      |
| APOB      | chr2:21255379   | c.1199G>A   | p.Arg400His  | missense_variant                         | Het      | MODERATE      |
| ARSD      | chrX:2833643    | c.954G>T    | p.Gln318His  | missense_variant                         | Het      | MODERATE      |
| ATG16L1   | chr2:234173756  | c.608A>G    | p.Asn203Ser  | missense_variant                         | Het      | MODERATE      |
| ATP11A    | chr13:113514610 | c.2737G>A   | p.Asp913Asn  | missense_variant                         | Het      | MODERATE      |
| BCL11B    | chr14:99641690  | c.1483G>A   | p.Ala495Thr  | missense_variant                         | Het      | MODERATE      |
| CA1       | chr8:86249206   | c.322C>T    | p.His108Tyr  | missense_variant                         | Het      | MODERATE      |
| CCAR2     | chr8:22476438   | c.2431A>G   | p.Asn811Asp  | missense_variant                         | Het      | MODERATE      |
| CCDC183   | chr9:139694856  | c.454G>A    | p.Glu152Lys  | missense_variant                         | Het      | MODERATE      |
| CD101     | chr1:117554282  | c.535C>T    | p.His179Tyr  | missense_variant                         | Het      | MODERATE      |
| CD200     | chr3:112063809  | c.170T>C    | p.Val57Ala   | missense_variant & splice_region_variant | Het      | MODERATE      |
| CDC27     | chr17:45214633  | c.1816T>G   | p.Tyr606Asp  | missense_variant                         | Het      | MODERATE      |
| CDC27     | chr17:45214669  | c.1780A>C   | p.Lys594Gln  | missense_variant                         | Het      | MODERATE      |
| CDC27     | chr17:45214699  | c.1750A>G   | p.Ser584Gly  | missense_variant                         | Het      | MODERATE      |
| CDC27     | chr17:45221273  | c.1164T>G   | p.Phe388Leu  | missense_variant                         | Het      | MODERATE      |
| CDC27     | chr17:45221286  | c.1151G>A   | p.Ser384Asn  | missense_variant                         | Het      | MODERATE      |
| CDC27     | chr17:45234298  | c.823C>G    | p.Leu275Val  | missense_variant                         | Het      | MODERATE      |
| CDC27     | chr17:45234343  | c.778A>C    | p.Asn260His  | missense_variant                         | Het      | MODERATE      |
| CDC27     | chr17:45249365  | c.169G>A    | p.Ala57Thr   | missense_variant                         | Het      | MODERATE      |
| CDC27     | chr17:45249391  | c.143A>C    | p.Tyr48Ser   | missense_variant                         | Het      | MODERATE      |
| CDH23     | chr10:73537483  | c.4892C>T   | p.Ala1631Val | missense_variant                         | Comp_Het | MODERATE      |
| CDX1      | chr5:149546749  | c.310C>T    | p.Pro104Ser  | missense_variant                         | Het      | MODERATE      |
| CGN       | chr1:151506533  | c.2825G>A   | p.Arg942Gln  | missense_variant                         | Het      | MODERATE      |
| CHAD      | chr17:48545520  | c.655C>T    | p.Arg219Trp  | missense_variant                         | Het      | MODERATE      |
| CHRNA9    | chr4:40356515   | c.1418T>G   | p.Leu473Trp  | missense_variant                         | Het      | MODERATE      |
| CNTN2     | chr1:205030396  | c.821G>A    | p.Arg274His  | missense_variant                         | Het      | MODERATE      |
| COL11A2   | chr6:33143391   | c.2336C>T   | p.Pro779Leu  | missense_variant                         | Het      | MODERATE      |
| COL18A1   | chr21:46876414  | c.970G>A    | p.Gly324Arg  | missense_variant                         | Het      | MODERATE      |
| COL26A1   | chr7:101192481  | c.970C>T    | p.Pro324Ser  | missense_variant                         | Het      | MODERATE      |
| COL3A1    | chr2:189859310  | c.1337G>A   | p.Arg446His  | missense_variant                         | Het      | MODERATE      |
| COL4A3    | chr2:228118353  | c.764C>T    | p.Thr255Met  | missense_variant & splice_region_variant | Het      | MODERATE      |
| COL5A1    | chr9:137582841  | c.193C>T    | p.Arg65Trp   | missense_variant                         | Het      | MODERATE      |
| CPS1      | chr2:211521333  | c.3661A>G   | p.Ile1221Val | missense_variant                         | Het      | MODERATE      |
| CTAGE4    | chr7:143964267  | c.2077T>C   | p.Phe693Leu  | missense_variant                         | Het      | MODERATE      |
| CTBP2     | chr10:126683123 | c.2315T>G   | p.Leu772Trp  | missense_variant                         | Het      | MODERATE      |
| CTBP2     | chr10:126683162 | c.2276G>A   | p.Arg759Gln  | missense_variant                         | Het      | MODERATE      |
| CYC1      | chr8:145150013  | c.11C>T     | p.Ala4Val    | missense_variant                         | Het      | MODERATE      |
| CYP4A11   | chr1:47407062   | c.44T>C     | p.Val15Ala   | missense_variant                         | Het      | MODERATE      |
| DDX23     | chr12:49239376  | c.190C>T    | p.Arg64Cys   | missense_variant                         | Het      | MODERATE      |
| DGKD      | chr2:234345020  | c.752T>G    | p.Val251Gly  | missense_variant                         | Het      | MODERATE      |
| DLGAP2    | chr8:1497493    | c.634G>A    | p.Gly212Ser  | missense_variant                         | Het      | MODERATE      |
| DNA2      | chr10:70192040  | c.1796G>A   | p.Arg599His  | missense_variant                         | Het      | MODERATE      |
| DNAH11    | chr7:21840783   | c.10055C>T  | p.Thr3352Met | missense_variant                         | Het      | MODERATE      |
| DNAH6     | chr2:84934697   | c.8905G>T   | p.Ala2969Ser | missense_variant                         | Het      | MODERATE      |
| DYSF      | chr2:71816729   | c.3409G>A   | p.Val1137Met | missense_variant                         | Het      | MODERATE      |
| ECM1      | chr1:150484263  | c.1120C>T   | p.Arg374Cys  | missense_variant                         | Het      | MODERATE      |

|               |                       |                     |                     |                                          |            |                 |
|---------------|-----------------------|---------------------|---------------------|------------------------------------------|------------|-----------------|
| ELP2          | chr18:33747114        | n.2015-2A>G         | .                   | splice_acceptor_variant & intron_variant | Het        | HIGH            |
| ENAH          | chr1:225706951        | c.751T>G            | p.Leu251Val         | missense_variant                         | Het        | MODERATE        |
| EPPK1         | chr8:144941229        | c.6193T>A           | p.Tyr2065Asn        | missense_variant                         | Het        | MODERATE        |
| EZR           | chr6:159197483        | c.752A>G            | p.Asn251Ser         | missense_variant                         | Het        | MODERATE        |
| FAT4          | chr4:126371616        | c.9451G>A           | p.Ala3151Thr        | missense_variant                         | Hom        | MODERATE        |
| FOLH1         | chr11:49207245        | c.802C>T            | p.Leu268Phe         | missense_variant                         | Het        | MODERATE        |
| FSIP2         | chr2:186657220        | c.5357A>G           | p.Asn1786Ser        | missense_variant                         | Het        | MODERATE        |
| GBX1          | chr7:150845855        | c.913G>A            | p.Val305Ile         | missense_variant                         | Het        | MODERATE        |
| GJB2          | chr13:20763228        | c.493C>T            | p.Arg165Trp         | missense_variant                         | Het        | MODERATE        |
| GPR45         | chr2:105858875        | c.560C>T            | p.Thr187Met         | missense_variant                         | Het        | MODERATE        |
| HK3           | chr5:176317824        | c.533G>C            | p.Arg178Thr         | missense_variant & splice_region_variant | Het        | MODERATE        |
| HMCN1         | chr1:186157125        | c.16525C>T          | p.Arg5509Trp        | missense_variant                         | Het        | MODERATE        |
| HNRNPDL       | chr4:83350731         | c.113T>C            | p.Leu38Pro          | missense_variant                         | Het        | MODERATE        |
| HSD3B2        | chr1:119964578        | c.454A>G            | p.Thr152Ala         | missense_variant                         | Het        | MODERATE        |
| HSD3B2        | chr1:119964590        | c.466T>C            | p.Tyr156His         | missense_variant                         | Het        | MODERATE        |
| IFT140        | chr16:1630800         | c.1484A>G           | p.Tyr495Cys         | missense_variant                         | Het        | MODERATE        |
| IGSF3         | chr1:117142868        | c.1784G>A           | p.Trp595*           | stop_gained                              | Het        | HIGH            |
| IGSF3         | chr1:117156459        | c.760G>A            | p.Asp254Asn         | missense_variant                         | Het        | MODERATE        |
| KCNH6         | chr17:61615462        | c.1538C>T           | p.Ala513Val         | missense_variant                         | Het        | MODERATE        |
| KCNQ4         | chr1:41289870         | c.1232G>A           | p.Arg411His         | missense_variant                         | Het        | MODERATE        |
| KIF13B        | chr8:29037656         | c.685A>G            | .                   | structural_interaction_variant           | Het        | HIGH            |
| KMT2B         | chr19:36212437        | c.2188G>A           | p.Gly730Arg         | missense_variant                         | Het        | MODERATE        |
| KMT5A         | chr12:123892186       | c.995T>C            | p.Leu332Pro         | missense_variant                         | Het        | MODERATE        |
| KRT77         | chr12:53086287        | c.1345T>C           | p.Tyr449His         | missense_variant                         | Het        | MODERATE        |
| LAMA4         | chr6:112438959        | c.4964G>A           | p.Gly1655Glu        | missense_variant                         | Het        | MODERATE        |
| LAMA5         | chr20:60885845        | c.10322C>T          | p.Thr3441Met        | missense_variant                         | Het        | MODERATE        |
| LMAN2         | chr5:176765576        | c.346G>A            | p.Val116Ile         | missense_variant                         | Het        | MODERATE        |
| LRP1          | chr12:57589660        | c.8575G>A           | p.Gly2859Ser        | missense_variant                         | Het        | MODERATE        |
| MET           | chr7:116339851        | c.713T>C            | .                   | structural_interaction_variant           | Het        | HIGH            |
| MYO15A        | chr17:18046138        | c.5894G>A           | p.Arg1965His        | missense_variant                         | Het        | MODERATE        |
| MYO3B         | chr2:171248911        | c.1697G>A           | p.Gly566Glu         | missense_variant                         | Het        | MODERATE        |
| NFE2L3        | chr7:26224939         | c.1621C>T           | p.Arg541Cys         | missense_variant                         | Het        | MODERATE        |
| NPC2          | chr14:74953134        | c.88G>A             | p.Val30Met          | missense_variant                         | Het        | MODERATE        |
| NPHP4         | chr1:5935048          | c.2930C>T           | p.Thr977Met         | missense_variant                         | Het        | MODERATE        |
| NPHP4         | chr1:5964791          | c.2029C>T           | p.Pro677Ser         | missense_variant                         | Het        | MODERATE        |
| NUDT14        | chr14:105643046       | c.253G>A            | p.Gly85Arg          | missense_variant                         | Het        | MODERATE        |
| <b>OTOF**</b> | <b>chr2:26702224</b>  | <b>c.2122C&gt;T</b> | <b>p.Arg708*</b>    | <b>stop_gained</b>                       | <b>Hom</b> | <b>HIGH</b>     |
| <b>OTOG**</b> | <b>chr11:17632285</b> | <b>c.5438T&gt;G</b> | <b>p.Val1813Gly</b> | <b>missense_variant</b>                  | <b>Het</b> | <b>MODERATE</b> |
| PADI2         | chr1:17396693         | c.1654C>T           | p.Arg552Cys         | missense_variant                         | Het        | MODERATE        |
| PCDH19        | chrX:99551307         | c.3415G>A           | p.Gly1139Ser        | missense_variant                         | Hom        | MODERATE        |
| PCDHGA8       | chr5:140772831        | c.451C>G            | p.Arg151Gly         | missense_variant                         | Het        | MODERATE        |
| PCNT          | chr21:47860930        | c.9556C>T           | p.Arg3186Trp        | missense_variant                         | Het        | MODERATE        |
| PDE6C         | chr10:95422392        | c.2359G>C           | p.Val787Leu         | missense_variant                         | Het        | MODERATE        |
| PDIA6         | chr2:10932003         | c.658G>A            | p.Asp220Asn         | missense_variant                         | Het        | MODERATE        |
| PIEZO1        | chr16:88804838        | c.645C>G            | p.His215Gln         | missense_variant                         | Het        | MODERATE        |
| PLG           | chr6:161152909        | c.1571C>T           | p.Ala524Val         | missense_variant                         | Het        | MODERATE        |
| POLE          | chr12:133208960       | c.6271C>T           | p.Pro2091Ser        | missense_variant                         | Het        | MODERATE        |
| POPDC3        | chr6:105609321        | c.464T>A            | p.Leu155His         | missense_variant                         | Het        | MODERATE        |
| PREX2         | chr8:69028025         | c.3184C>T           | p.Arg1062Cys        | missense_variant                         | Het        | MODERATE        |
| PTCH1         | chr9:98209306         | c.4232A>G           | p.Asp1411Gly        | missense_variant                         | Het        | MODERATE        |
| PYGL          | chr14:51404515        | c.284C>T            | p.Thr95Ile          | missense_variant                         | Het        | MODERATE        |
| RAB13         | chr1:153955263        | c.346C>T            | p.Arg116Cys         | missense_variant                         | Het        | MODERATE        |
| RDH12         | chr14:68191267        | c.146C>T            | p.Thr49Met          | missense_variant                         | Het        | MODERATE        |

|                         |                       |                     |                  |                                |            |             |
|-------------------------|-----------------------|---------------------|------------------|--------------------------------|------------|-------------|
| <i>RHPN1</i>            | chr8:144461673        | c.940G>A            | p.Ala314Thr      | missense_variant               | Het        | MODERATE    |
| <i>RYR3</i>             | chr15:33952507        | c.4505G>T           | p.Arg1502Leu     | missense_variant               | Het        | MODERATE    |
| <i>SBF2</i>             | chr11:10011136        | c.1303G>A           | p.Ala435Thr      | missense_variant               | Het        | MODERATE    |
| <i>SHANK1</i>           | chr19:51171270        | c.3947G>A           | p.Gly1316Asp     | missense_variant               | Het        | MODERATE    |
| <i>SHC3</i>             | chr9:91628436         | c.1711C>G           | p.Leu571Val      | missense_variant               | Het        | MODERATE    |
| <b><i>SLC26A4</i>**</b> | <b>chr7:107340581</b> | <b>c.1668T&gt;A</b> | <b>p.Tyr556*</b> | <b>stop_gained</b>             | <b>Het</b> | <b>HIGH</b> |
| <i>SLC5A8</i>           | chr12:101588886       | c.524T>G            | p.Phe175Cys      | missense_variant               | Het        | MODERATE    |
| <i>SLC6A9</i>           | chr1:44489938         | c.12A>C             | p.Lys4Asn        | missense_variant               | Het        | MODERATE    |
| <i>SMARCA2</i>          | chr9:2039627          | c.517C>T            | p.Pro173Ser      | missense_variant               | Het        | MODERATE    |
| <i>SNTG2</i>            | chr2:1079293          | c.162T>G            | p.Ile54Met       | missense_variant               | Het        | MODERATE    |
| <i>SPC25</i>            | chr2:169733775        | c.319A>C            | p.Lys107Gln      | missense_variant               | Het        | MODERATE    |
| <i>SPEF2</i>            | chr5:35793307         | c.4601A>C           | p.Asp1534Ala     | missense_variant               | Het        | MODERATE    |
| <i>SPTBN5</i>           | chr15:42169085        | c.3773G>T           | p.Ser1258Ile     | missense_variant               | Het        | MODERATE    |
| <i>SRCAP</i>            | chr16:30740333        | c.5705A>G           | p.Glu1902Gly     | missense_variant               | Het        | MODERATE    |
| <i>SYT8</i>             | chr11:1857809         | c.716C>T            | p.Pro239Leu      | missense_variant               | Het        | MODERATE    |
| <i>TBL3</i>             | chr16:2026871         | c.1349C>T           | p.Pro450Leu      | missense_variant               | Het        | MODERATE    |
| <i>TCOF1</i>            | chr5:149767544        | c.2939C>T           | p.Ala980Val      | missense_variant               | Het        | MODERATE    |
| <i>THAP4</i>            | chr2:242545814        | c.79G>T             | .                | structural_interaction_variant | Het        | HIGH        |
| <i>TOP3B</i>            | chr22:22314764        | c.1583C>T           | p.Thr528Met      | missense_variant               | Het        | MODERATE    |
| <i>TRPM5</i>            | chr11:2434057         | c.2282C>T           | p.Pro761Leu      | missense_variant               | Het        | MODERATE    |
| <i>UNC45A</i>           | chr15:91492564        | c.1897C>T           | p.Arg633Trp      | missense_variant               | Het        | MODERATE    |
| <i>WFS1</i>             | chr4:6303902          | c.2380G>A           | p.Glu794Lys      | missense_variant               | Het        | MODERATE    |
| <i>WIPI1</i>            | chr17:66453538        | c.25C>T             | p.Pro9Ser        | missense_variant               | Het        | MODERATE    |
| <i>XRCC1</i>            | chr19:44058892        | c.320G>A            | p.Arg107His      | missense_variant               | Het        | MODERATE    |

\*Very rare variant (no homozygous variant was found in ExAC, 1000G and GenomAD databases).

†Pathogenic mutation in the present study.

\*\*Novel gene mutation (not found in ExAC, 1000G and GenomAD databases).

ClinVar submissions from the current study: *OTOF* (SCV001448680.1), *OTOG* (SCV001448682.1) and *SLC26A4* (SCV001448681.1).

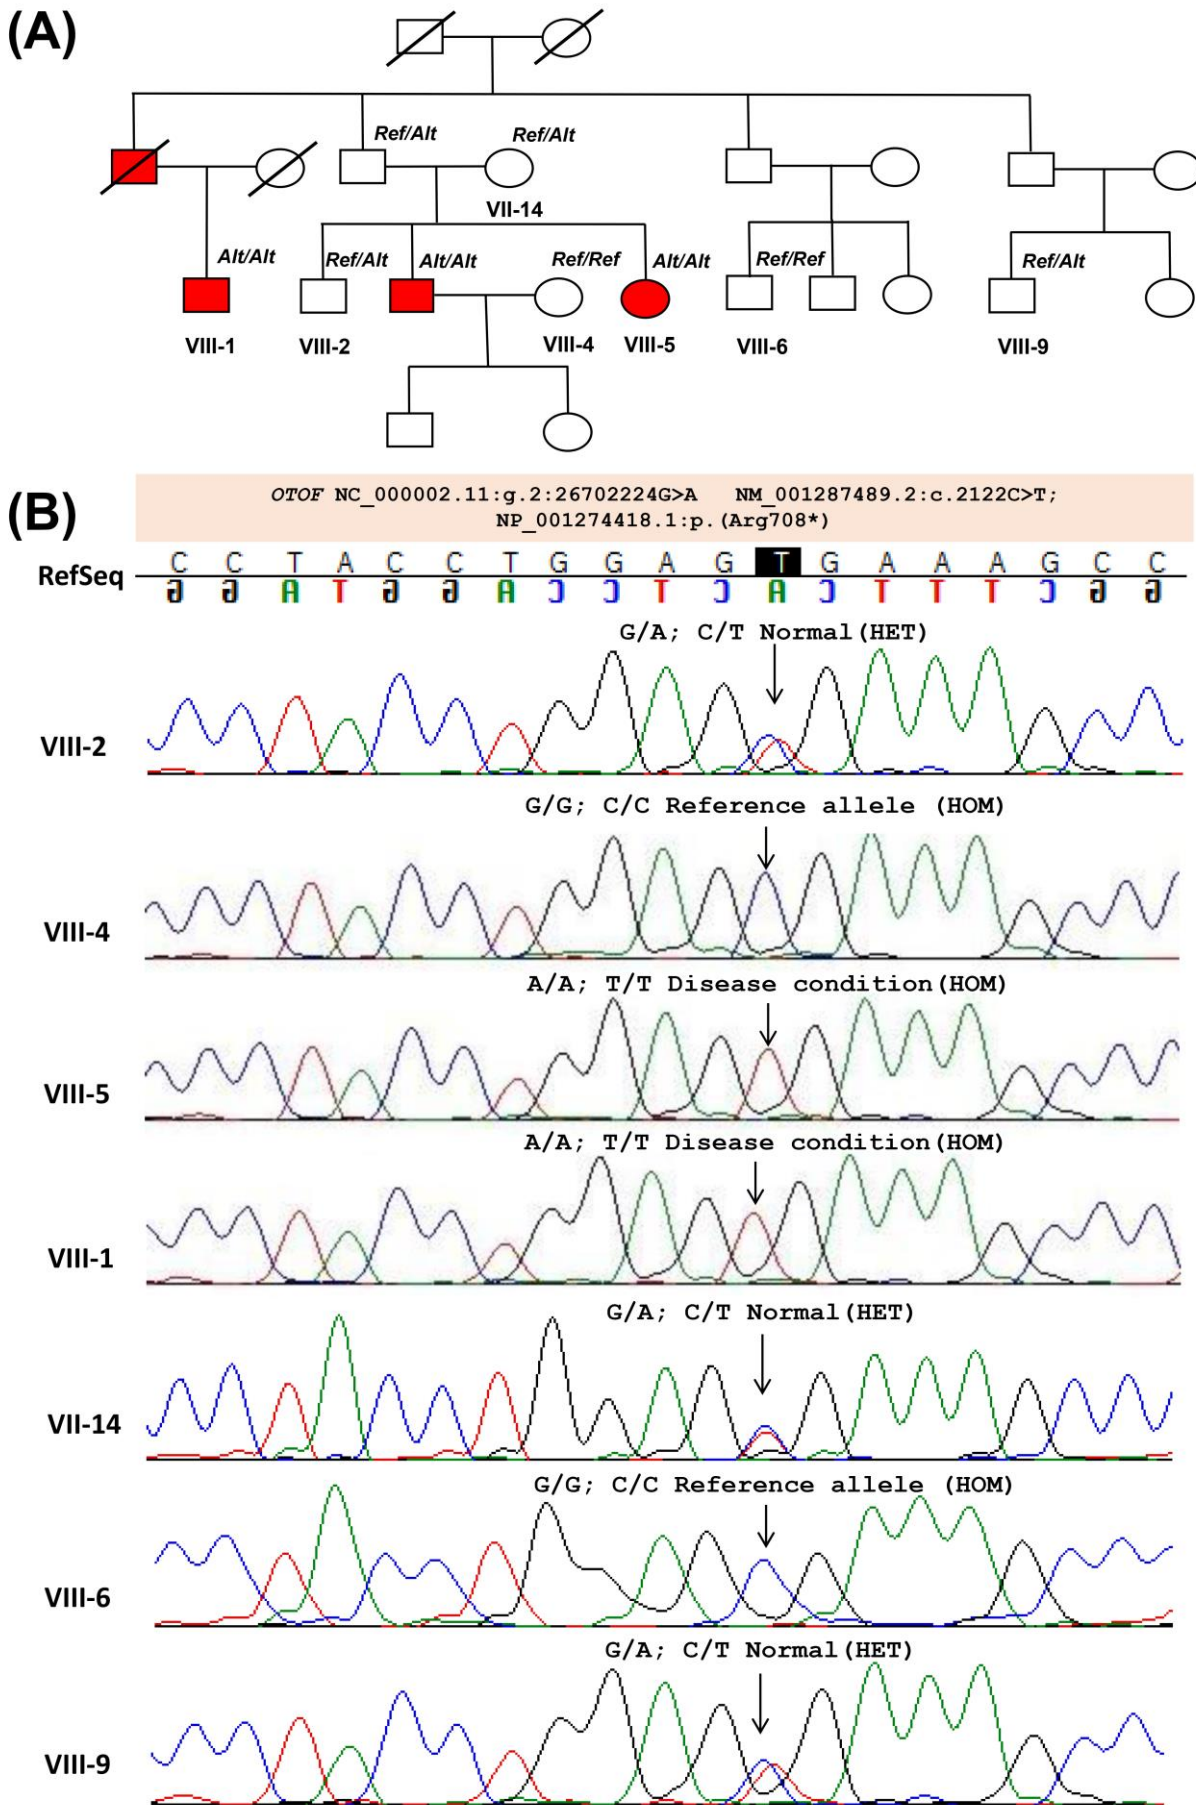

**Figure S4. Variant segregation and Sanger sequencing.** (A) Pedigree showing the inheritance and *OTOF* variant segregation in seven samples (B) Sanger sequencing data to reconfirm the mutation identified by WES.



NC\_000002.12:g.2:26479356G>A

NM\_194248.2:c.2122C>T

NP\_001274418.1:p.(Arg708\*)

rs80356590

(A)

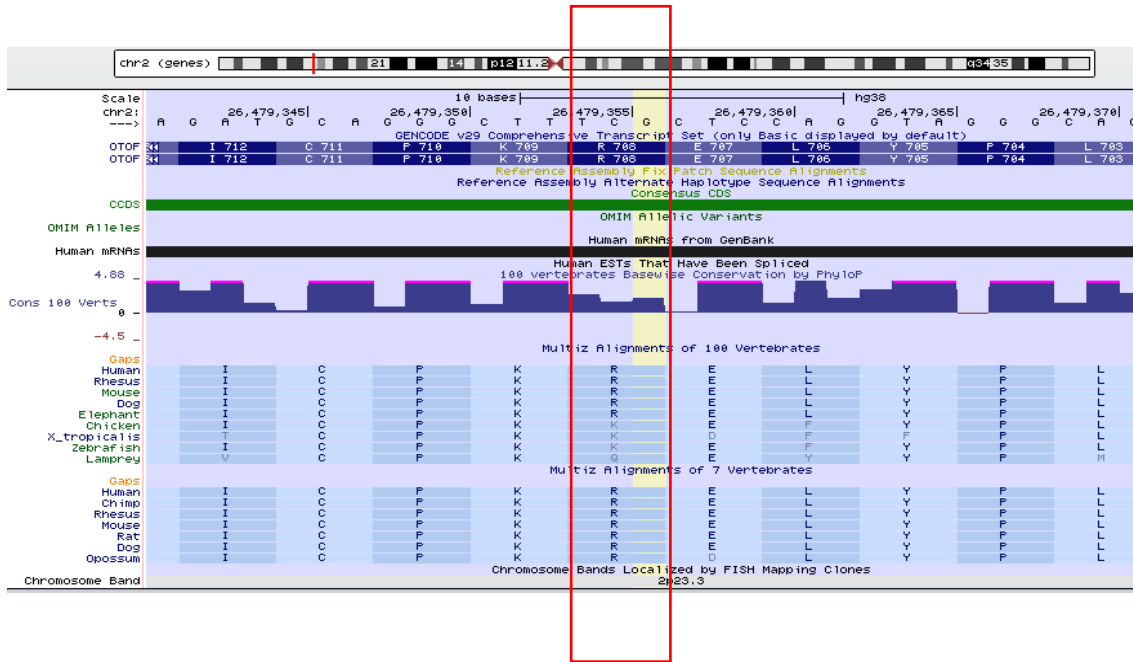

(B)

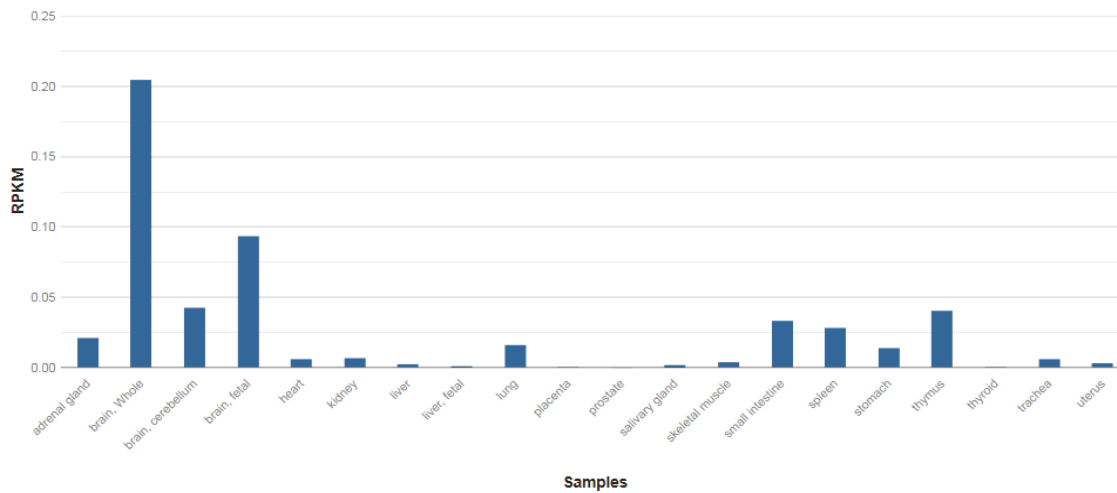

**Figure S5.** (A) Screenshot from UCSC Genome Browser showing the conserved region of the *OTOF* gene via Multiz alignments of 7 vertebrates (B) *OTOF* gene expression (mRNA) from 20 human tissues (Source: NCBI, Gene ID: 9381 BioProject: PRJNA280600 updated: 26-06-2019).
